# Supplementary material
Source: publisher site journal article supplement (https://www.dovepress.com/article/537052)
Supplement: Supplementary file 1 [file Supplementary%20Figures%20and%20Legends_1.docx]

**S1(A)**


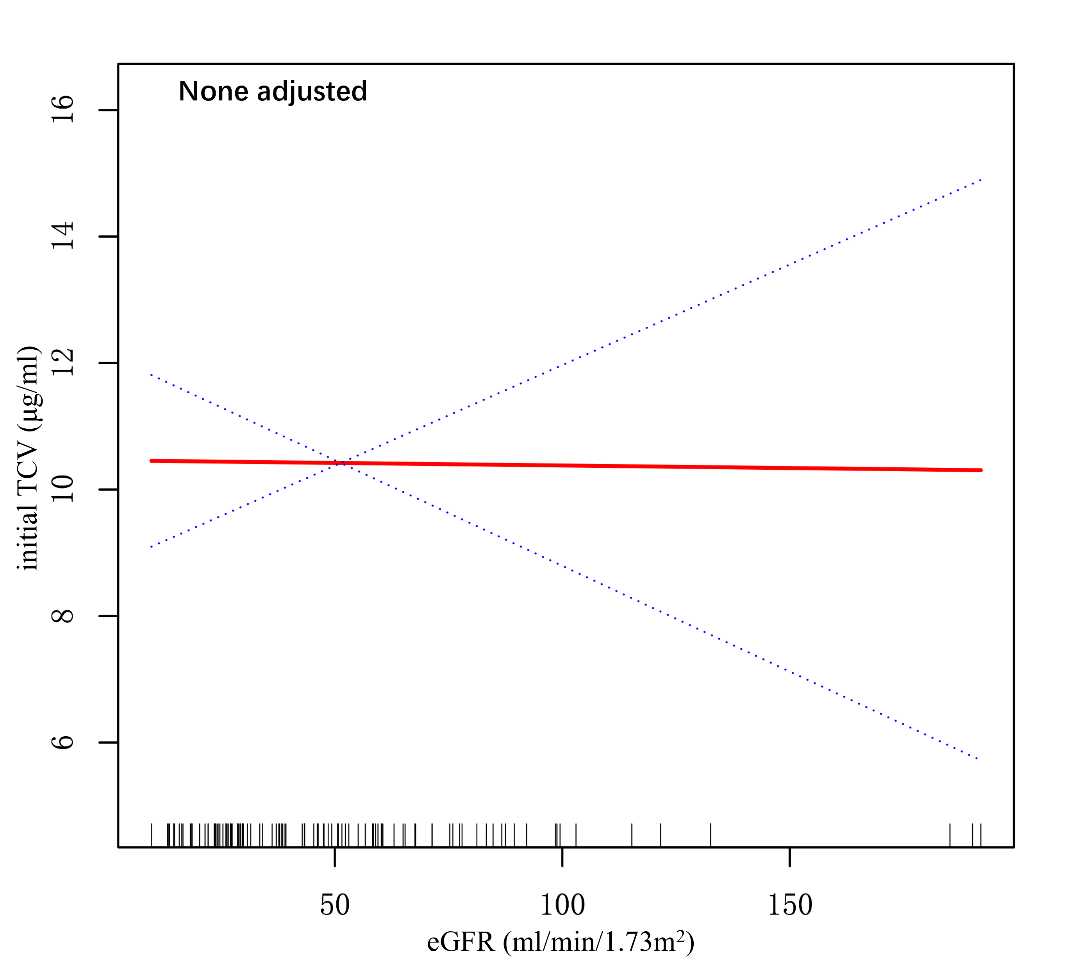


**S1(B)**


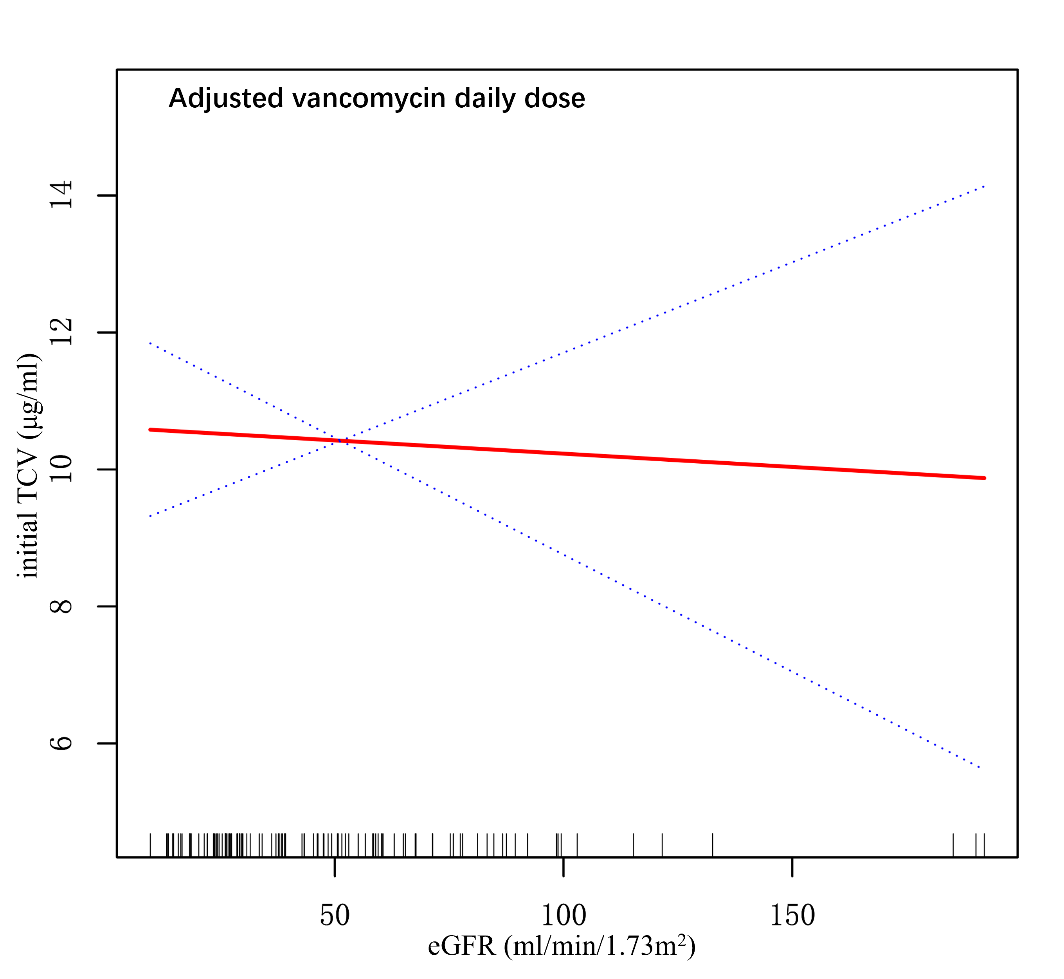


[Supplementary Figure 1] A linear association between eGFR and initial TCV in neonates. Solid red line represents the smooth curve fit between variables. Blue bands represent the 95% of confidence interval from the fit. None adjusted in Supplementary Figure 1(A). All adjusted for daily vancomycin dose in Supplementary Figure 1(B).
